# Supplementary material for: Fabrication of core–shell type poly(NIPAm)-encapsulated citral and its application on bamboo as an anti-molding coating
Source: Royal Society of Chemistry journal article supplement (doi:10.1039/d1ra06352a), 2021-01-01
Supplement: d1ra06352a1.pdf [file d1ra06352a1.pdf]

## Supplementary information

**Table 1.** Classification Standard of Surface Infection Levels of Samples

| Levels | Infected Area of Sample                   |
|--------|-------------------------------------------|
| 0      | No hyphae or mildew on the sample surface |
| 1      | Infected area of sample < 1/4             |
| 2      | Infected area of sample 1/4–1/2           |
| 3      | Infected area of sample 1/2–3/4           |
| 4      | Infected area of sample > 3/4             |

**Table 2.** Factor level

| Level | Factor |       |        |
|-------|--------|-------|--------|
|       | A (mg) | B (h) | C (°C) |
| 1     | 10     | 1     | 25     |
| 2     | 30     | 2     | 30     |
| 3     | 50     | 3     | 35     |

**Table 3.** Results of the repeated experiment of the optimum formula

| Test No. | EC (%) | Deviation (%) |
|----------|--------|---------------|
| 1        | 83.656 | - 0.128       |
| 2        | 83.658 | - 0.126       |
| 3        | 84.039 | 0.255         |
| Mean     | 83.784 |               |

**Table 4.** LCST results of PNIPAm/Citral nanohydrogels were determined by visual method

| Temperature / °C     | 28 | 29 | 30 | 31 | 32 | 33 | 34 | 35 | 36  |
|----------------------|----|----|----|----|----|----|----|----|-----|
| Phase transformation | No | Yes |

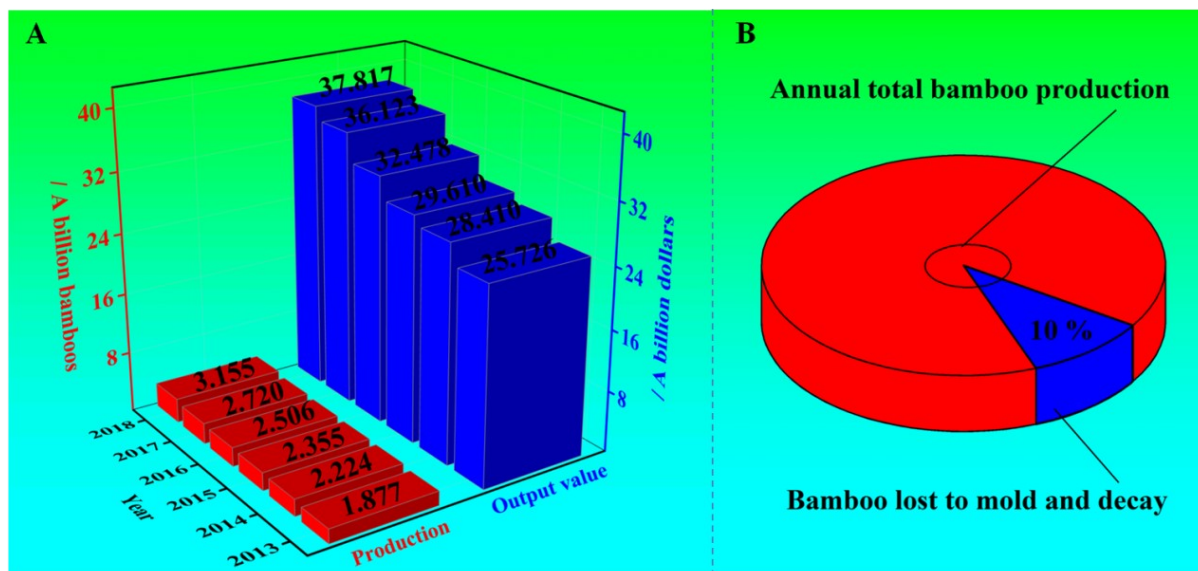

**A:** Production and output value of bamboo in China 2013-2018; **B:** Annual, the proportion of mold and decay bamboo in total bamboo production
